# Supplementary material for: Male-specific association between MT-ND4 11719 A/G polymorphism and ulcerative colitis: a mitochondria-wide genetic association study
Source: BMC Gastroenterol. 2016 Oct 3;16:118. doi: 10.1186/s12876-016-0509-1 (PMC5048482; doi:10.1186/s12876-016-0509-1)
Supplement: Additional file 8: Table S5. — Results for nuclear SNPs with p value < 1·10−04 for interaction with rs2853495 in the subgroup of males, sorted by chromosomal positions. (DOC 78 kb) [file 12876_2016_509_MOESM8_ESM.doc]

**Table S5:** Results for nuclear SNPs with p value < 1∙10-04 for interaction with rs2853495 in the subgroup of males, sorted by chromosomal positions.

| Chra | Nuclear SNP | Positionb | A1c | p value | | | Gene |
| --- | --- | --- | --- | --- | --- | --- | --- |
| nucleard | mitoe | interactionf |
| 1 | rs6664866 | 11000721 | T | 2.3610-03 | 3.8810-07 | 4.6110-05 |  |
| rs10800238 | 166456387 | T | 3.7610-03 | 4.1410-07 | 5.6810-05 | *RP11-276E17.2* |
| rs7552571 | 166456476 | T | 3.1210-03 | 5.3110-07 | 4.9210-05 | *RP11-276E17.2* |
| rs7552777 | 166456704 | T | 2.6510-03 | 2.0310-07 | 2.1910-05 | *RP11-276E17.2* |
| 2 | rs12621507 | 105784318 | T | 1.5510-02 | 5.5810-07 | 5.7710-05 |  |
| rs6747261 | 109510152 | C | 4.2510-05 | 8.5310-06 | 6.7210-05 | *EDAR* |
| rs6746848 | 141471725 | G | 2.8210-03 | 9.4010-07 | 7.3510-05 | *LRP1B* |
| rs11894546 | 150057912 | A | 1.0410-01 | 1.6710-07 | 1.9210-05 | *LYPD6B* |
| rs415974 | 77637545 | T | 1.2210-02 | 3.7010-01 | 9.2710-05 | *LRRTM4* |
| 3 | rs9820958 | 114353168 | A | 7.7510-03 | 1.4210-05 | 9.6410-05 | *ZBTB20* |
| rs9841454 | 114362596 | C | 3.4310-02 | 1.3010-05 | 9.7110-05 | *ZBTB20* |
| rs541855 | 127496076 | T | 2.2110-04 | 8.8410-01 | 5.0710-05 | *MGLL* |
| rs586919 | 127496088 | C | 2.0810-04 | 9.0510-01 | 4.7510-05 | *MGLL* |
| rs12638237 | 40063887 | G | 2.7610-02 | 1.0110-04 | 5.2710-05 | *MYRIP* |
| 7 | rs3113304 | 68549929 | G | 5.8810-03 | 1.2410-06 | 9.3110-05 |  |
| 10 | rs11016262 | 130266862 | T | 1.0710-01 | 3.4310-01 | 1.9410-05 |  |
| rs4237441 | 14975171 | T | 2.6710-02 | 2.1210-05 | 5.0610-05 | *DCLRE1C* |
| rs7091361 | 29855186 | G | 3.4910-03 | 1.3910-01 | 7.6610-05 | *SVIL* |
| rs973286 | 29865078 | C | 2.9210-03 | 1.6110-01 | 8.9210-05 | *SVIL* |
| rs10826663 | 29874104 | C | 3.0010-03 | 2.8210-01 | 9.0610-05 | *SVIL* |
| rs11009199 | 33342328 | C | 2.9210-03 | 4.3210-06 | 6.6710-05 | *RP11-462L8.1* |
| rs1106789 | 87553409 | G | 2.5510-03 | 3.4810-07 | 2.6510-06 | *GRID1* |
| rs1880386 | 87611943 | T | 9.4110-03 | 4.4110-06 | 5.0310-05 | *GRID1* |
| 11 | rs2703758 | 130368730 | C | 2.4410-03 | 3.7310-06 | 9.6410-05 |  |
| rs11607974 | 17233864 | A | 1.3910-02 | 6.3210-01 | 1.7610-05 | *NUCB2* |
| rs1425802 | 35158401 | C | 1.9610-02 | 1.9310-06 | 9.8910-05 | *CD44* |
| rs7938811 | 35177552 | C | 7.0110-04 | 2.8710-06 | 3.7610-06 | *CD44* |
| rs11037114 | 42889289 | T | 1.0810-01 | 8.2710-07 | 9.2810-05 |  |
| 12 | rs11519533 | 17088421 | C | 1.9210-04 | 3.3810-05 | 5.1110-05 |  |
| rs7311005 | 99204594 | G | 3.6510-02 | 6.0310-01 | 9.7110-05 | *ANKS1B* |
| 13 | rs1218787 | 27961940 | T | 1.2110-02 | 3.0310-06 | 8.1710-05 |  |
| rs9522923 | 90952373 | C | 7.1510-03 | 3.3610-01 | 8.6910-05 |  |
| rs1408885 | 90952780 | A | 3.3510-03 | 5.9710-01 | 7.0610-05 |  |
| 14 | rs3180753 | 95659747 | T | 8.6010-03 | 9.9910-07 | 4.5010-05 | *CLMN* |
| 15 | rs10444830 | 53797943 | C | 4.5910-02 | 8.6310-01 | 2.2510-05 |  |
| rs12440270 | 53804400 | C | 6.4510-02 | 9.1210-01 | 4.0410-05 | *WDR72* |
| rs12440842 | 53824229 | T | 3.8010-02 | 9.3110-01 | 7.0410-05 | *WDR72* |
| 16 | rs2369690 | 22920852 | A | 4.4810-02 | 1.7010-05 | 2.9010-05 | *HS3ST2* |
| rs9935276 | 24242392 | A | 4.7110-03 | 6.1610-01 | 3.8610-06 |  |
| 17 | rs7225156 | 1895906 | G | 1.2510-03 | 5.1110-02 | 4.5010-06 | *RTN4RL1* |
| 21 | rs2839575 | 44126116 | A | 3.7410-01 | 3.8010-07 | 4.7010-05 | *PDE9A* |

aChromosome; bPositions according to UCSC version hg19; cMinor allele; dMain effect of nuclear SNP; eMain effect of mitochondrial SNP; fInteraction term.
